# Supplementary figures and images for: Tracing the climate signal: mitigation of anthropogenic methane emissions can outweigh a large Arctic natural emission increase
Source: Springer Nature journal article supplement (doi:10.1038/s41598-018-37719-9), 2019-02-04

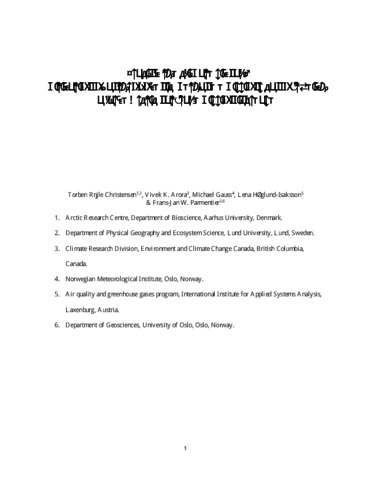

Supplement: MOESM1 [file 41598_2018_37719_MOESM1_ESM.pdf]
